# Supplementary material
Source: PubMed Central journal article supplement (PMC8376746)
Supplement: NIHMS1663079-supplement-1.pdf [file NIHMS1663079-supplement-1.pdf]

## Supplemental methods

### *Monte Carlo sampling approach*

We used LD-score regression implemented in Genomic SEM to obtain a 5x5  $r_G$  matrix constructed from the two traits of interest plus the three SES indicators. This  $r_G$  matrix served as basis for the Genomic SEM models as shown in the main text figure 1. The unique elements of the  $r_G$  matrix are stored in a vector  $\mu$ . In genomic SEM, variance of all estimates (factor loadings, residual variances, regression paths and correlations) are based on the variability of the  $r_G$  matrix. This variability is calculated during LD score regression with the leave-one-chromosome-out jackknife method. That is, multivariate LD score regression  $r_G$  matrix is not only calculated for the full set of SNPs, but also 22 times each time leaving the SNPs on one chromosome out. Each of these  $r_G$  matrices varies slightly around the full, 22 chromosome estimate. From these genetic (co)variance matrices the standard error of all  $h^2$  and  $r_G$  estimates are calculated. In addition, the covariance between all estimates is calculated. Since a symmetric 5x5 matrix holds  $5(5+1)/2=15$  unique estimates, this means that it creates a 15x15 matrix with variance of the 15 estimates on the diagonal, and covariance between estimates on the off-diagonals. This 15x15 matrix is called  $\sigma$ . Note that the covariance between estimates tends to be substantial. It is important to include this covariance in the modelling, because assuming that  $r_G$  estimation errors are independent will lead to substantial loss of statistical power and incorrect inference. Supplementary Figure 1 shows a graphical depiction of the estimated matrices and their elements, and the sampling procedure.

Armed with the point estimate vector  $\mu$  and the covariance in matrix  $\sigma$ , we used R function `mvrnorm` (MASS package) to create random samples that keeps all dependencies intact. Restructuring each sample back to an  $r_G$  matrix, we refitted the two models (that is, either with or without regressing out SES variance; see main text figure 1) and compared the estimates of  $h^2$  and  $r_G$  between these two models. To establish significance of effects we counted the proportion of times an estimate was larger in the first compared to the second model (i.e., before and after partialling out SES variance).

Statistical source data for all figures, of the main text and Extended Data, can be found in the Supplementary Tables file.

$$\begin{bmatrix} h_{t1}^2 & & & & \\ rg_{(t2,t1)} & h_{t2}^2 & & & \\ rg_{(EA,t1)} & rg_{(EA,t2)} & h_{EA}^2 & & \\ rg_{(TI,t1)} & rg_{(TI,t1)} & rg_{(TI,EA)} & h_{TI}^2 & \\ rg_{(HI,t1)} & rg_{(HI,t1)} & rg_{(HI,EA)} & rg_{(HI,TI)} & h_{HI}^2 \end{bmatrix}$$

$$[h_{t1}^2 \quad rg_{(t2,t1)} \quad rg_{(EA,t1)} \quad \dots \quad h_{HI}^2] = \mu$$

$$\begin{bmatrix} \sigma_{h_{t1}^2}^2 & & & & & \\ \sigma_{rg_{(t2,t1)}h_{t1}^2}^2 & \sigma_{rg_{(t2,t1)}}^2 & & & & \\ \sigma_{rg_{(EA,t1)}h_{t1}^2}^2 & \sigma_{rg_{(EA,t1)}rg_{(t2,t1)}}^2 & \sigma_{rg_{(EA,t1)}}^2 & & & \\ \vdots & \vdots & \vdots & \ddots & & \\ \sigma_{h_{HI}^2h_{t1}^2}^2 & \sigma_{h_{HI}^2rg_{(t2,t1)}}^2 & \sigma_{h_{HI}^2rg_{(EA,t1)}}^2 & \sigma_{rg_{(HI,t1)}h_{t1}^2}^2 & \sigma_{h_{HI}^2}^2 & \end{bmatrix} = \text{sigma}$$

$$\begin{array}{l} 1 \quad \sim h_{t1}^2 \quad \sim rg_{(t2,t1)} \quad \sim rg_{(EA,t1)} \quad \dots \quad \sim h_{HI}^2 \\ 2 \quad \sim h_{t1}^2 \quad \sim rg_{(t2,t1)} \quad \sim rg_{(EA,t1)} \quad \dots \quad \sim h_{HI}^2 \\ 3 \quad \vdots \quad \vdots \quad \vdots \quad \vdots \quad \vdots \end{array}$$

$$\begin{bmatrix} \sim h_{t1}^2 & & & & \\ \sim rg_{(t2,t1)} & \sim h_{t2}^2 & & & \\ \sim rg_{(EA,t1)} & \sim rg_{(EA,t2)} & \sim h_{EA}^2 & & \\ \sim rg_{(TI,t1)} & \sim rg_{(TI,t1)} & \sim rg_{(TI,EA)} & \sim h_{TI}^2 & \\ \sim rg_{(HI,t1)} & \sim rg_{(HI,t1)} & \sim rg_{(HI,EA)} & \sim rg_{(HI,TI)} & \sim h_{HI}^2 \end{bmatrix}$$

**Supplementary Figure 1. Steps in producing random samplings of the LD-score regression SNP- $h^2$  and  $r_G$  matrix. The 5x5  $r_G$  matrix is restructured into 1x15 vector  $\mu$ . Variability of the estimates as obtained in LD-score regression using a leave-one-chromosome-out jackknife method are restructured into 15x15 matrix  $\text{sigma}$ , which holds the standard error of the 15 unique estimates in  $h^2$  and  $r_G$  on the diagonal, and the covariance between these estimates on the off-diagonals. These are entered into `mvrnorm` to obtain 1000 row vectors. Finally, each row of 120 correlated samples is restructured back into a symmetric 15x15  $r_G$  matrix, representing a resampled version of the matrix. This matrix is then used in the same analyses as described in the methods.**
